# Supplementary material for: A Molecular Mechanism for Bacterial Susceptibility to Zinc
Source: PLoS Pathog. 2011 Nov 3;7(11):e1002357. doi: 10.1371/journal.ppat.1002357 (PMC3207923; doi:10.1371/journal.ppat.1002357)
Supplement: Table S6 — PsaA-Mn(II) structure data collection and refinement statistics. (DOC) [file ppat.1002357.s009.doc]

**Table S6. Mn(II)-PsaA structure data collection and refinement statistics**

| **Data collection statistics** |  |
| --- | --- |
| Wavelength (Å) | 1.89445 |
| Data collection temperature (K) | 100 |
| Space group | *P*21 |
| Unit cell parameters: a, b, c (Å); , ,  () | 68.7, 108.0, 78.3; 90.0, 95.8, 90.0 |
| Resolution range (outer shell in brackets; Å) | 19.8 – 2.74 (2.89 – 2.74) |
| Unique reflections | 28,404 |
| Total observations | 96,596 |
| <I / (I)> all (outer shell) | 9.3 (1.7) |
| Rmerge all (outer shell) (%)a | 9.6 (56.7) |
| Completeness all (outer shell) (%) | 99.2 (73.1) |
| Multiplicity | 3.4 |
| Wilson B-factor (Å2) | 75.1 |
| **Refinement statistics** |  |
| Amino acid residues (chains A, B, C, D) | 32-309, 32-309, 32-309, 32-309 |
| Non-hydrogen protein atoms in the model | 9,025 |
| Metal ions in the model | 4 × Mn(II) |
| Water molecules in the model | 154 |
| Solvent content (%) | 45.1 |
| Bond length deviation from ideal values (Å) | 0.016 |
| Bond angle deviation from ideal values () | 1.629 |
| Dihedral angle deviation from ideal values () | 18.8 |
| Average B-factor (Å2) | 37.7 |
| Ramachandran favored/outliers (%) | 93.8/0.4 |
| Reflections used (working/free) | 27,892/1,487 |
| Rwork/Rfree (%)b | 21.5/24.6 |
| MolProbity score (43rd percentile) | 2.96 |
| Cruickshank’s DPI for coordinate error (Å)c | 0.36 |

a Rmerge = ∑*hkl*(∑*i*(|I *hkl,i*-<I *hkl* >|))/∑*hkl,i* <I *hkl*>, where I *hkl,i* is the intensity of an individual measurement of the reflection with Miller indices h, k and l, and <Ihkl> is the mean intensity of that reflection. Calculated for I > -3(I).

b Rwork = ∑*hkl*(||Fobs*hkl*|-|Fcalc*hkl*||)/|Fobs*hkl*|, where |Fobs*hkl*| and |Fcalc*hkl*| are the observed and calculated structure factor amplitudes.

Rfree = Rfree is equivalent to Rwork but calculated using the reflections (5 %) omitted from the refinement process.

c Cruickshank’s DPI is calculated using the R-factor, the number of reflections and parameters with the data completeness taken into account.
